# Supplementary material
Source: PubMed Central journal article supplement (PMC8535106)
Supplement: 11166_2021_9359_MOESM1_ESM.pdf [file 11166_2021_9359_MOESM1_ESM.pdf]

## Online Appendix

### **“Risk Avoidance, Offsetting Community Effects, and COVID-19: Evidence from an Indoor Political Rally”**

*Journal of Risk and Uncertainty*

Dhaval Dave

Center for Health Economics & Policy Studies  
Bentley University, IZA & NBER  
Email: [ddave@bentley.edu](mailto:ddave@bentley.edu)

Andrew Friedson

Center for Health Economics & Policy Studies  
University of Colorado, Denver  
Email: [andrew.friedson@ucdenver.edu](mailto:andrew.friedson@ucdenver.edu)

Kyutaro Matsuzawa

Center for Health Economics & Policy Studies  
San Diego State University  
Email: [qmatsuzawa@gmail.com](mailto:qmatsuzawa@gmail.com)

Drew McNichols

Center for Health Economics & Policy Studies  
University of California, San Diego and San Diego State University  
Email: [dmcnichols@ucsd.edu](mailto:dmcnichols@ucsd.edu)

Connor Redpath

Center for Health Economics & Policy Studies  
University of California, San Diego  
Email: [credpath@ucsd.edu](mailto:credpath@ucsd.edu)

Joseph J. Sabia

Center for Health Economics & Policy Studies  
San Diego State University & IZA  
Email: [jsabia@sdsu.edu](mailto:jsabia@sdsu.edu)

**Appendix Figure 1. Distribution of Home Counties for Absolute Inflows to Treatment Census Block Groups on June 6, 2020**

*Panel (a): Home Counties Across U.S.*

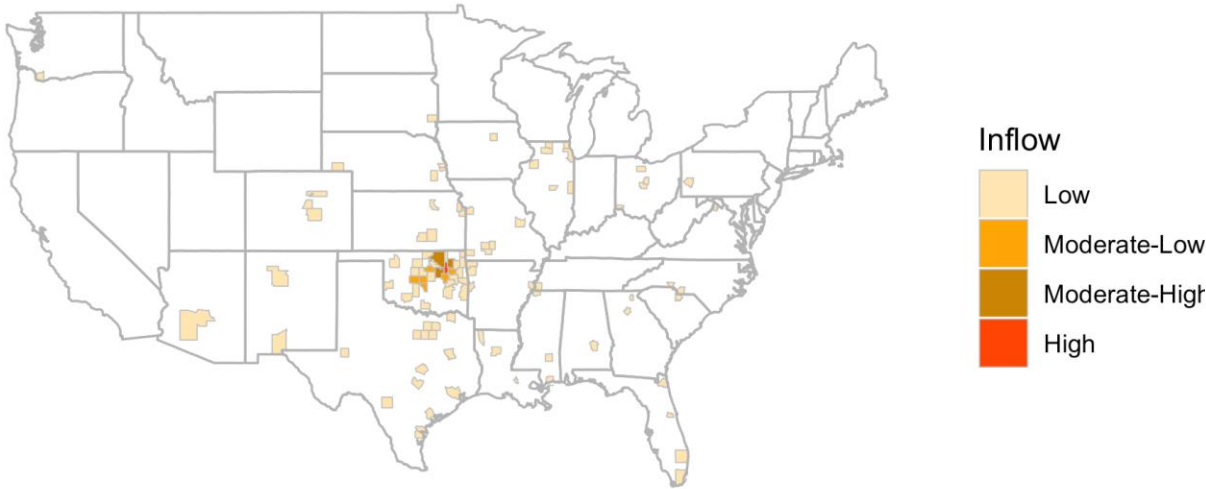

*Panel (b): Home Counties Across Oklahoma*

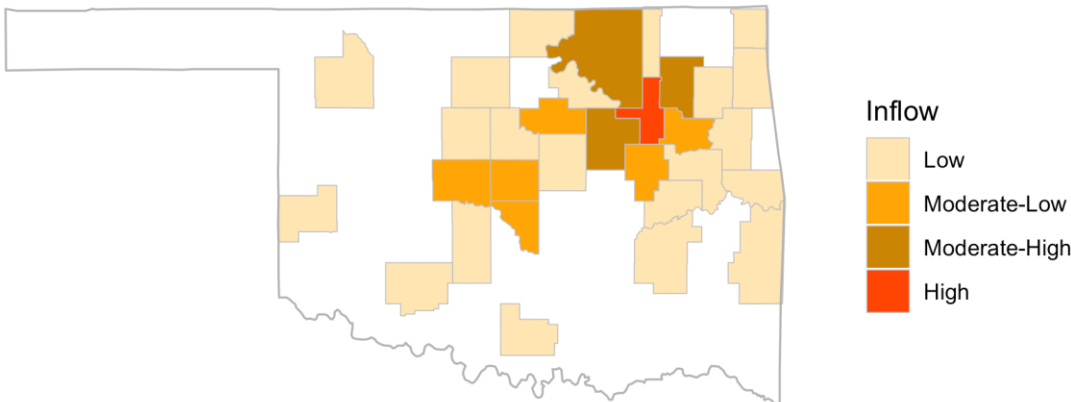

*Panel (c): Home Counties Across Oklahoma and Border States*

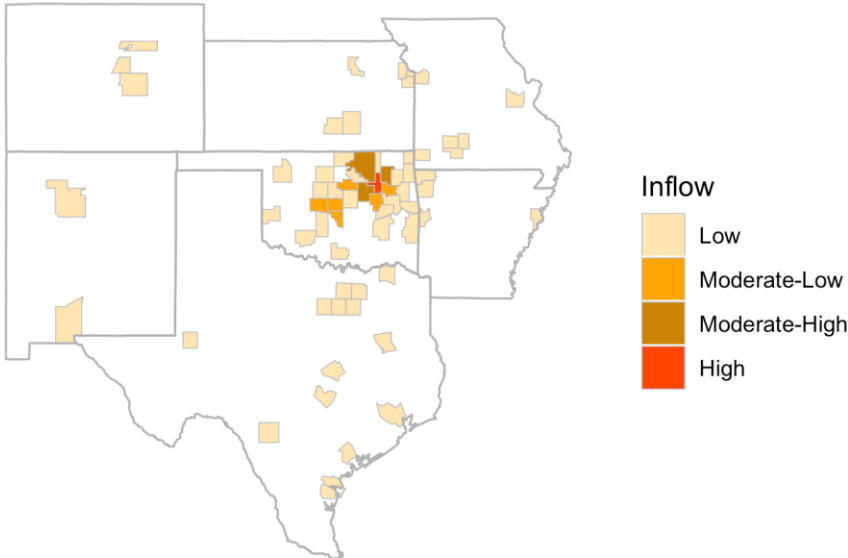

## Appendix Figure 2. Synthetic Control Estimates of Effect of Tulsa Rally on Foot Traffic in Tulsa County

Panel (a): Foot Traffic into Restaurant + Bars

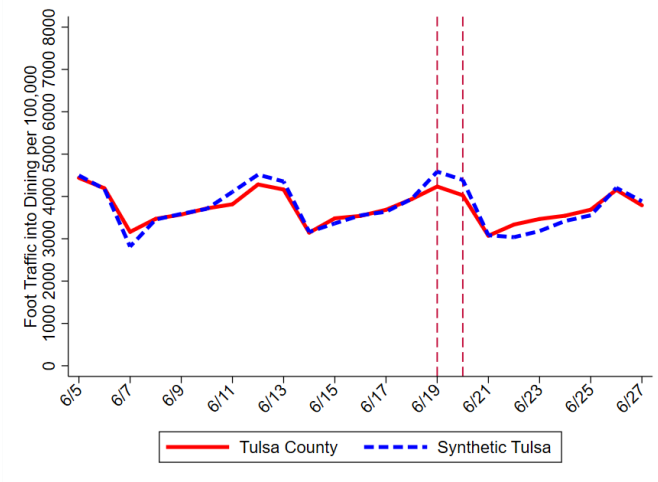

Panel (b): Foot Traffic into Bars

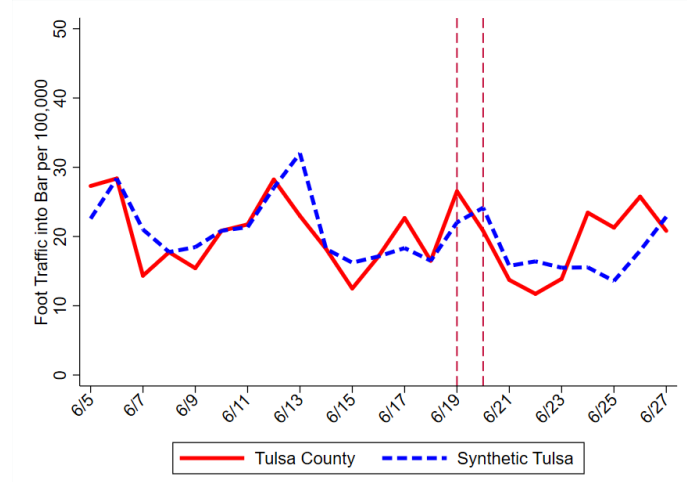

Panel (c): Foot Traffic into Restaurants

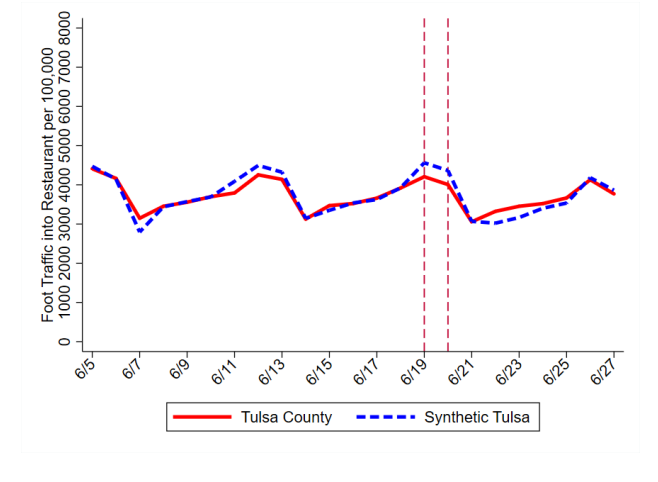

Panel (d): Foot Traffic into Retail

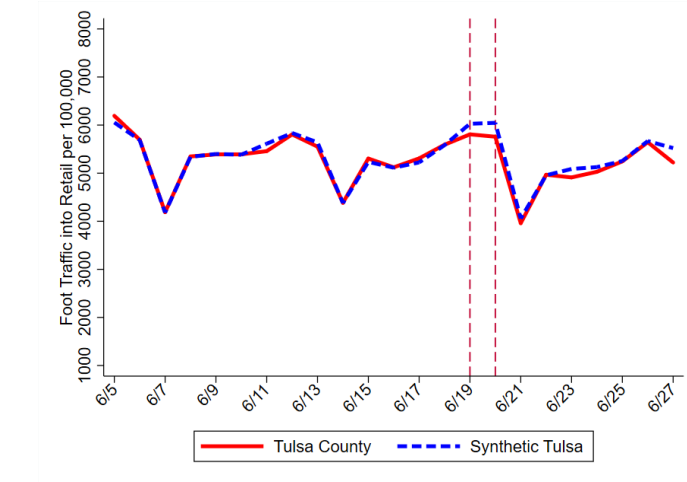

Note: The donor pool is comprised of primary counties (and their border counties) with urbanicity of  $\pm 2.5$  Tulsa County's urbanicity rate (95.2%) or weighted population density of  $\pm 1,000$  Tulsa County's density (3,250) and excludes counties in Oklahoma and in Oklahoma's border states, as well as counties where a home resident was detected (via smartphone using SafeGraph data) in the treatment CBGs on June 20, 2020.

## Appendix Figure 2, Continued

*Panel (e): Foot Traffic into Hotels*

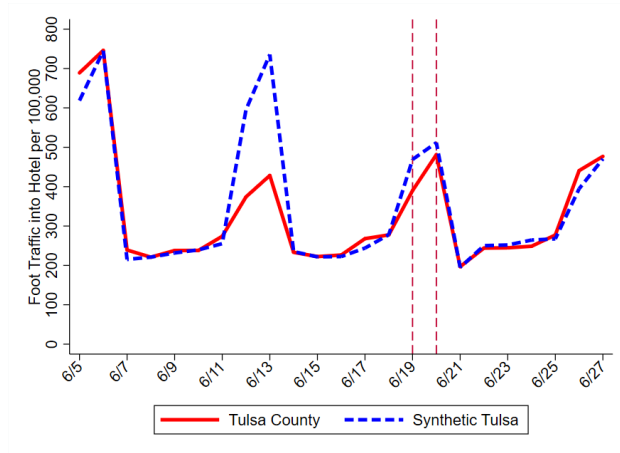

*Panel (f): Foot Traffic into Entertainment Venues*

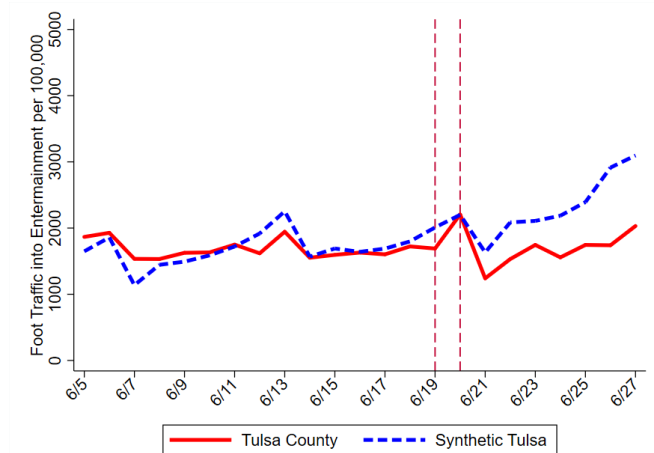

Note: The donor pool is comprised of primary counties (and their border counties) with urbanicity of  $\pm 2.5$  Tulsa County's urbanicity rate (95.2%) or weighted population density of  $\pm 1,000$  Tulsa County's density (3,250) and excludes counties in Oklahoma and in Oklahoma's border states, as well as counties where a home resident was detected (via smartphone using SafeGraph data) in the treatment CBGs on June 20, 2020.

### Appendix Figure 3. Synthetic Control Estimates of Effect of Tulsa Rally on Foot Traffic in Tulsa Cluster

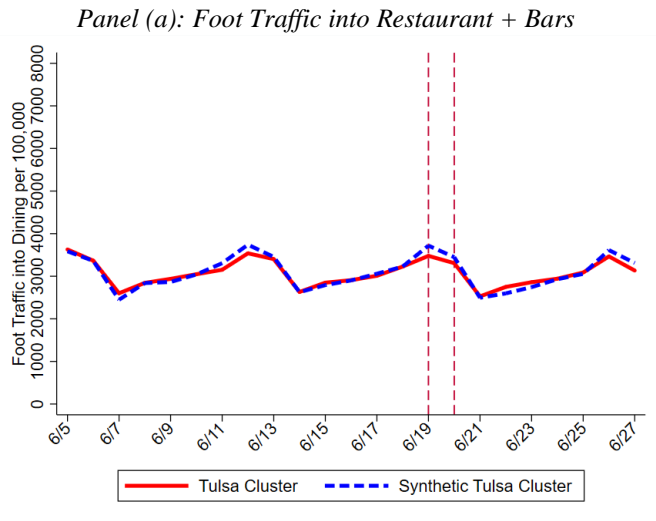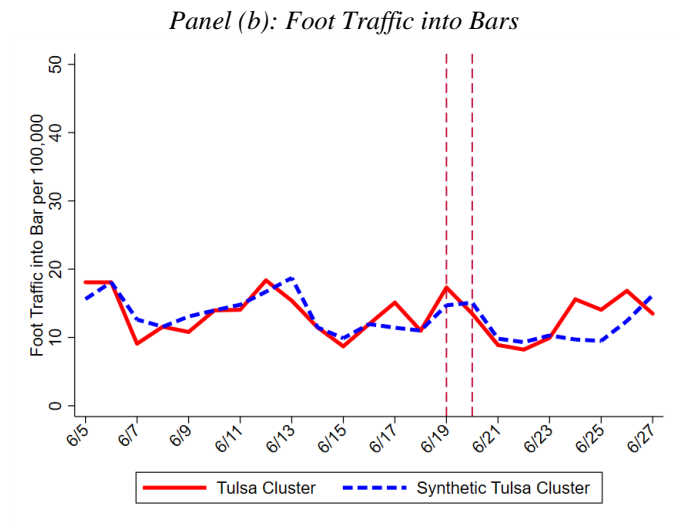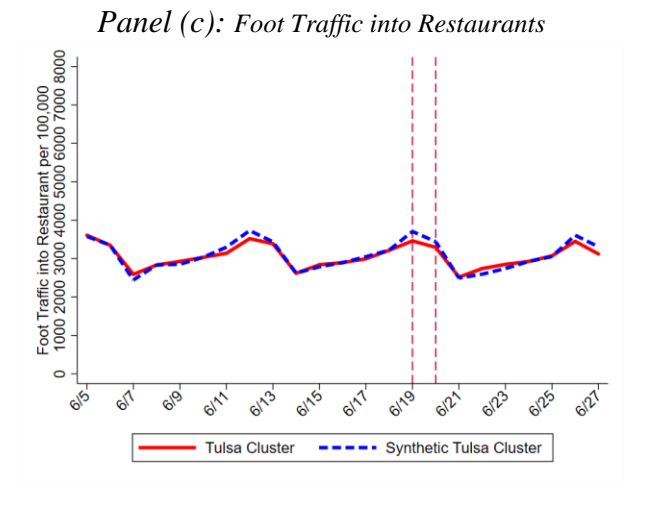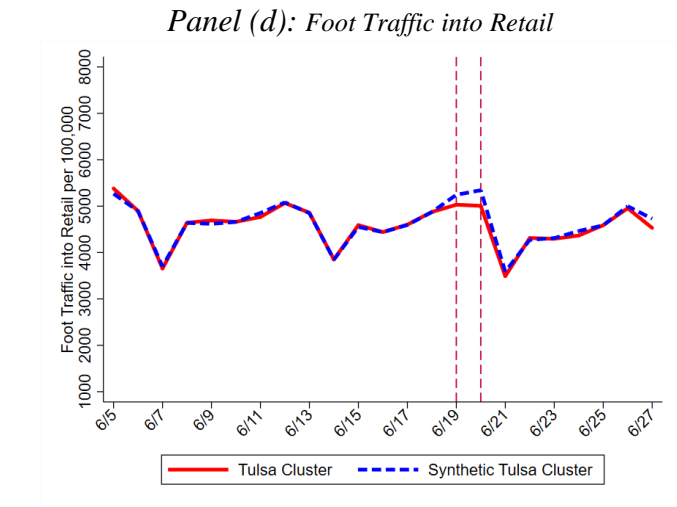

Note: The donor pool is comprised of primary counties (and their border counties) with urbanicity of  $\pm 2.5$  Tulsa County's urbanicity rate (95.2%) or weighted population density of  $\pm 1,000$  Tulsa County's density (3,250) and excludes counties in Oklahoma and in Oklahoma's border states, as well as counties where a home resident was detected (via smartphone using SafeGraph data) in the treatment CBGs on June 20, 2020.

**Appendix Figure 3, Continued.**

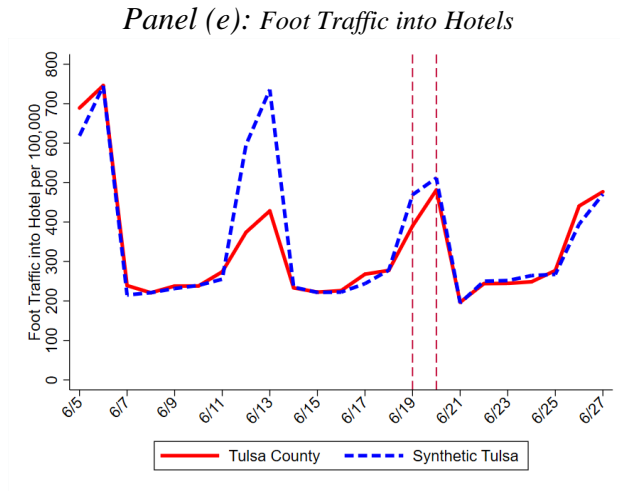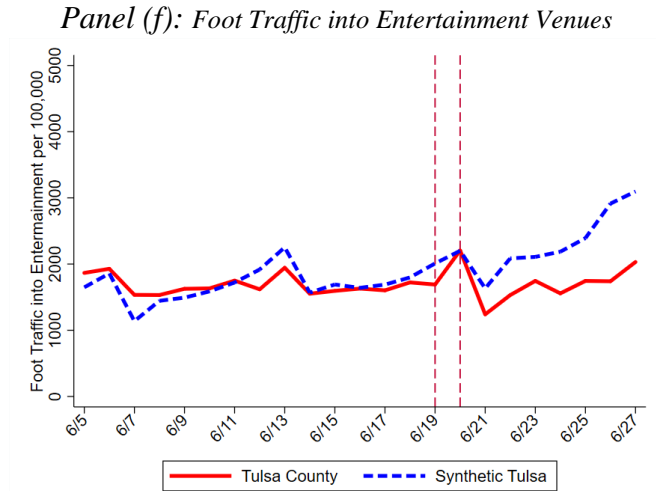

Note: The donor pool is comprised of primary counties (and their border counties) with urbanicity of  $\pm 2.5$  Tulsa County's urbanicity rate (95.2%) or weighted population density of  $\pm 1,000$  Tulsa County's density (3,250) and excludes counties in Oklahoma and in Oklahoma's border states, as well as counties where a home resident was detected (via smartphone using SafeGraph data) in the treatment CBGs on June 20, 2020.

## Appendix Figure 4. Sensitivity of Synthetic Control Estimates of Effect of Tulsa Rally on COVID-19 Cases in Tulsa County to Alternate State Testing Rate Matching

Panel (a): Matching on pre- and post- treatment mean

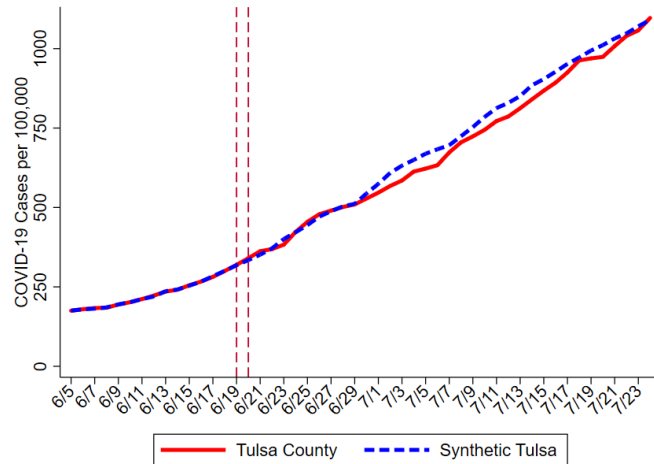

Panel (b): Matching on pre-treatment testing trend

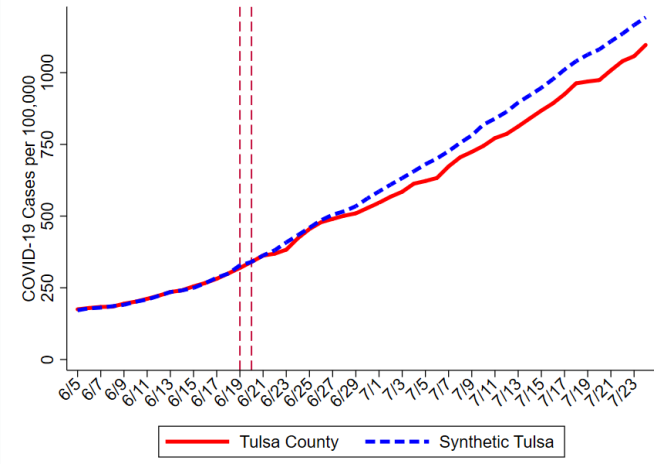

Panel (c): Matching on pre & post-treatment testing trend

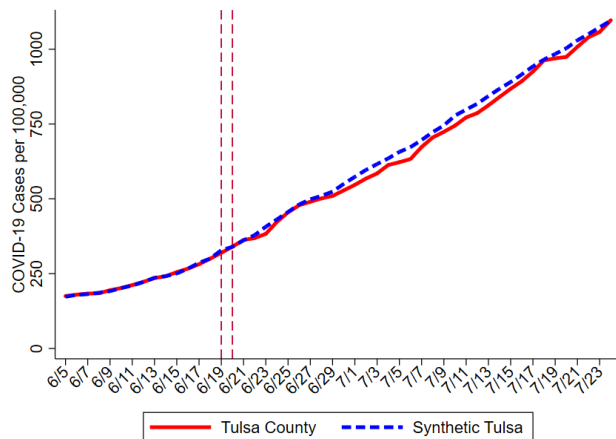

Panel (d): Matching on pre & post-treatment testing trend (More Days)

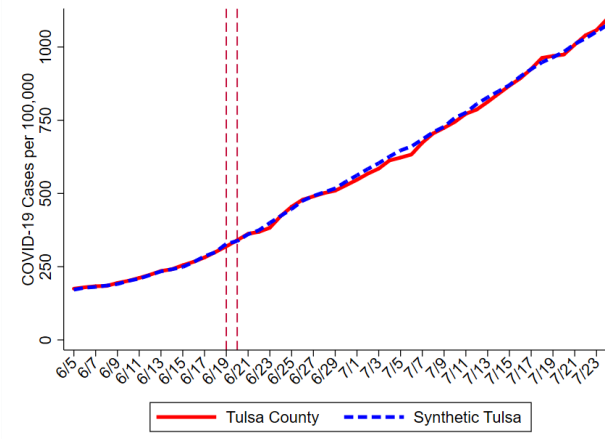

Note: The donor pool is comprised of primary counties (and their border counties) with urbanicity of  $\pm 2.5$  Tulsa County's urbanicity rate (95.2%) or weighted population density of  $\pm 1,000$  Tulsa County's density (3,250) and excludes counties in Oklahoma and in Oklahoma's border states, as well as counties where a home resident was detected (via smartphone using SafeGraph data) in the treatment CBGs on June 20, 2020. Panel (b) matches on COVID-19 testing rate on 6/6, 6/8, 6/10, 6/14, 6/16, and 6/18. Panel (c) matches on COVID-19 testing rate on 6/6, 6/14, 6/22, 6/28, 7/4, 7/12, and 7/20. Panel (d) matches on COVID-19 testing on 6/6, 6/12, 6/18, 6/24, 6/30, 7/6, 7/12, 7/18, and 7/24.

**Appendix Figure 5. Sensitivity of Synthetic Control Estimates of Effect of Tulsa Rally on COVID-19 Cases in Tulsa County Cluster to Alternate State Testing Rate Matching**

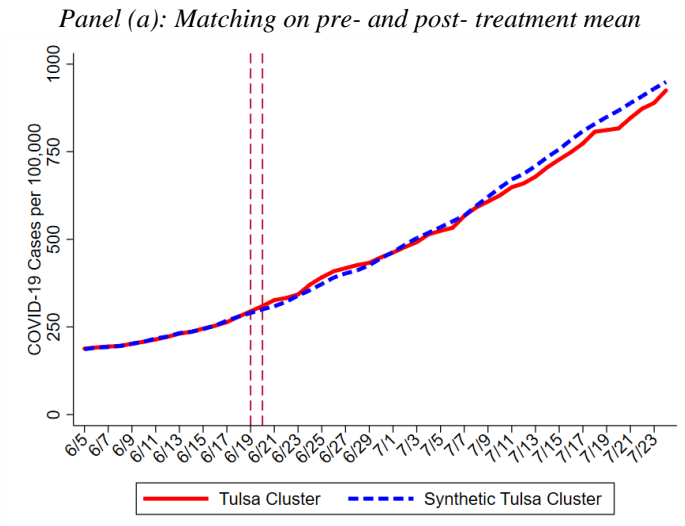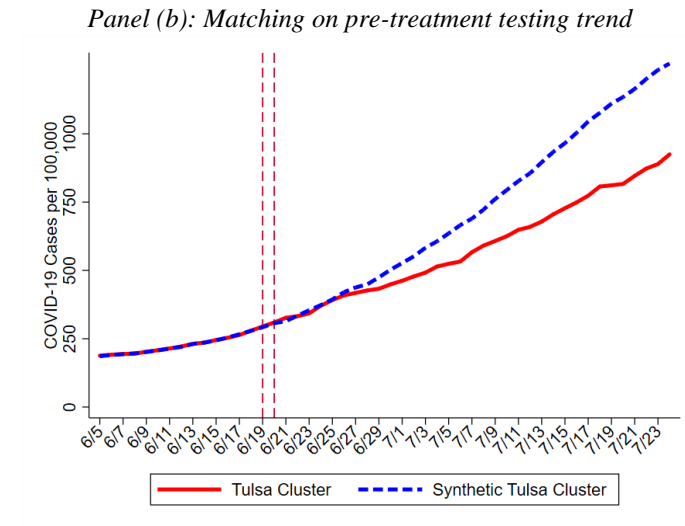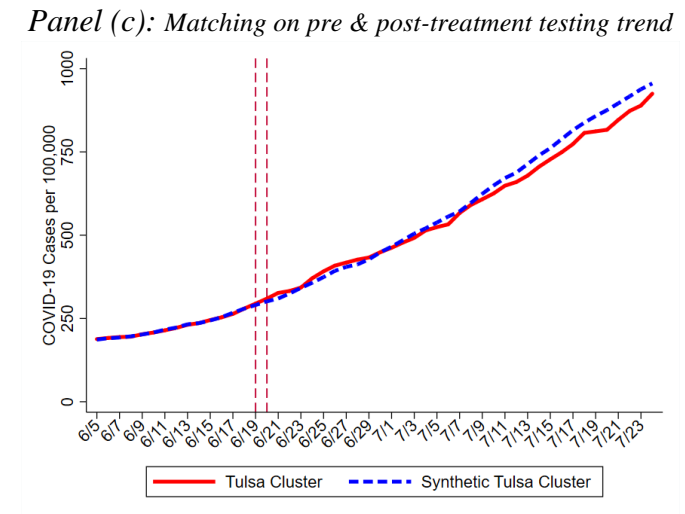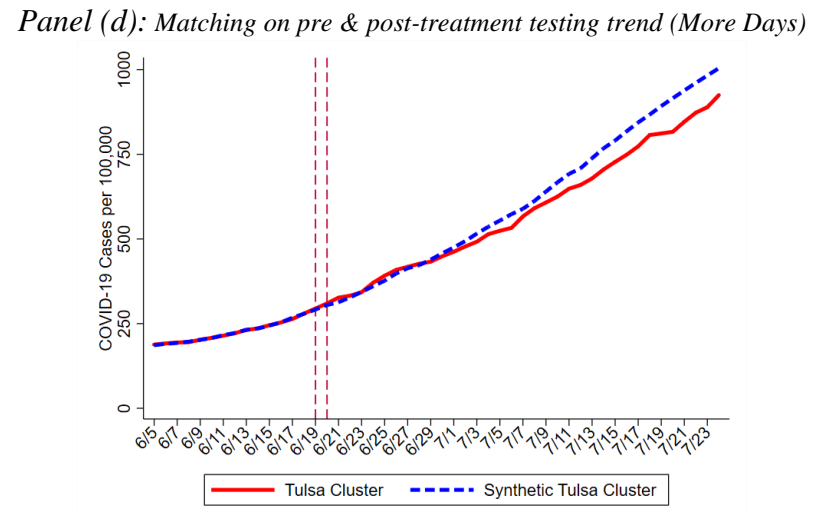

Note: The donor pool is comprised of primary counties (and their border counties) with urbanicity of  $\pm 2.5$  Tulsa County's urbanicity rate (95.2%) or weighted population density of  $\pm 1,000$  Tulsa County's density (3,250) and excludes counties in Oklahoma and in Oklahoma's border states, as well as counties where a home resident was detected (via smartphone using SafeGraph data) in the treatment CBGs on June 20, 2020. Panel (b) matches on COVID-19 testing rate on 6/6, 6/8, 6/10, 6/14, 6/16, and 6/18. Panel (c) matches on COVID-19 testing rate on 6/6, 6/14, 6/22, 6/28, 7/4, 7/12, and 7/20. Panel (d) matches on COVID-19 testing on 6/6, 6/12, 6/18, 6/24, 6/30, 7/6, 7/12, 7/18, and 7/24.



## Appendix Figure 6. Sensitivity of Synthetic Control Estimates of Effect of Tulsa Rally on COVID-19 Cases in Oklahoma to Alternate State Testing Rate Matching

*Panel (a): Matching on pre- and post- treatment mean*

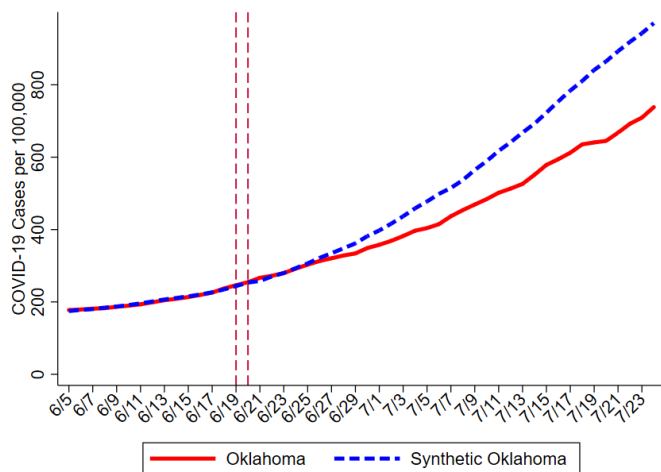

*Panel (b): Matching on pre-treatment testing trend*

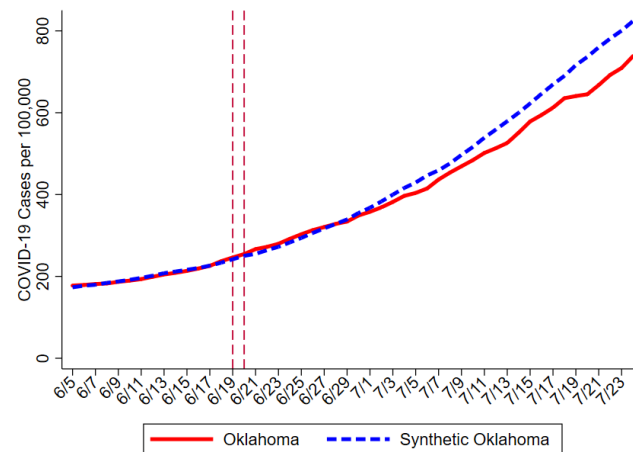

*Panel (c): Matching on pre & post-treatment testing trend*

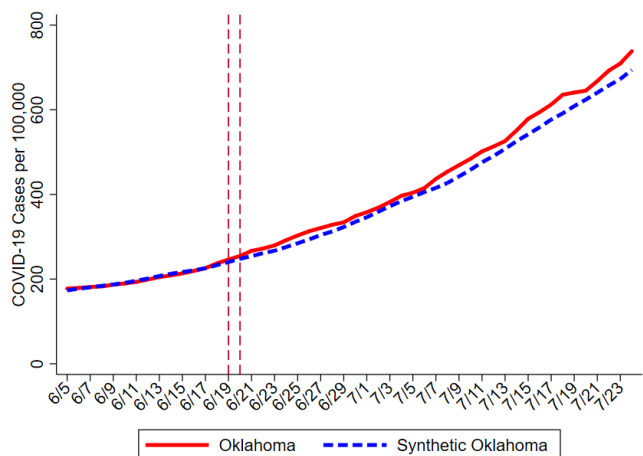

*Panel (d): Matching on pre & post-treatment testing trend (More Days)*

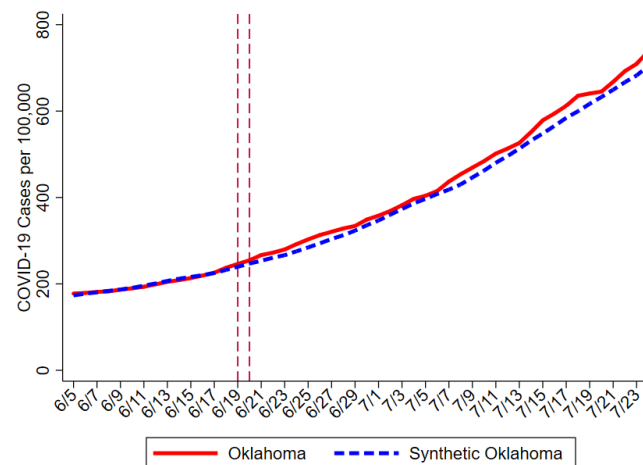

Note: The donor pool is comprised of states with urbanicity of  $\pm 15$  Oklahoma's urbanicity rate (65%) or with weighted population density  $\pm 750$  Oklahoma's Population Density (2,150) and excludes counties in Oklahoma and in Oklahoma's border states. Panel (b) matches on COVID-19 testing rate on 6/6, 6/8, 6/10, 6/14, 6/16, and 6/18. Panel (c) matches on COVID-19 testing rate on 6/6, 6/14, 6/22, 6/28, 7/4, 7/12, and 7/20. Panel (d) matches on COVID-19 testing on 6/6, 6/12, 6/18, 6/24, 6/30, 7/6, 7/12, 7/18, and 7/24.

## Appendix Figure 7. Synthetic Control Estimates of Effect of Tulsa Rally on COVID-19 Deaths

*Panel (a): Tulsa County– Matching on Six days of Pre-Treatment COVID-19 Case Rates, Pre-Treatment Stay-at-Home Behavior, Mask Wearing Policy, and COVID-19 Reopening Policy*

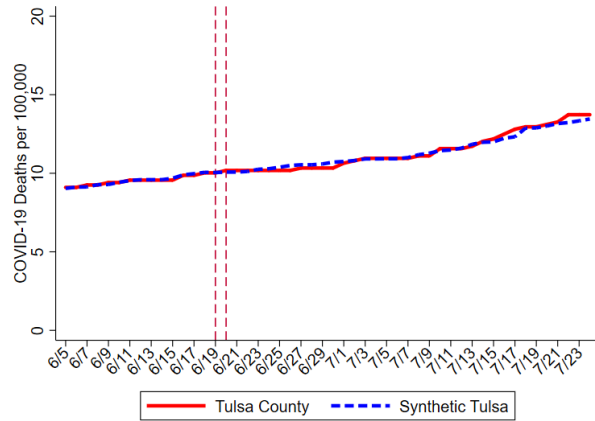

*Panel (b): Tulsa County– Matching on Six days of Pre-Treatment COVID-19 Case Rates, Pre-Treatment Stay-at-Home Behavior, COVID-19 Testing Rate, COVID-19 Reopening Policy, and Mask Wearing Policy*

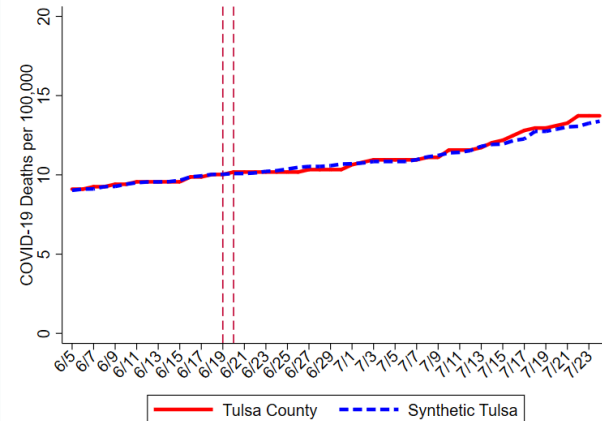

*Panel (c): Tulsa County Cluster – Matching on Six days of Pre-Treatment COVID-19 Case Rates, Pre-Treatment Stay-at-Home Behavior, Mask Wearing Policy, and COVID-19 Reopening Policy*

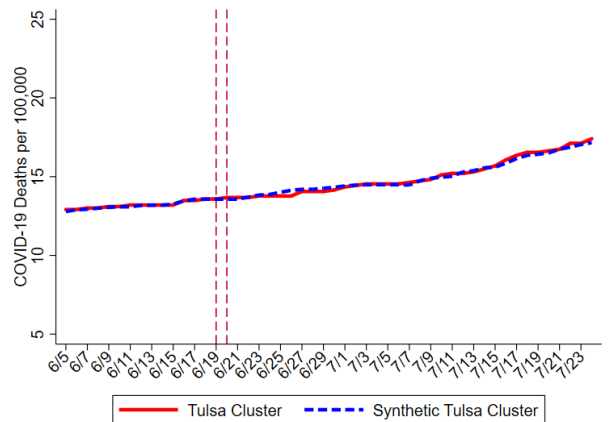

*Panel (d): Tulsa County Cluster – Matching on Six days of Pre-Treatment Log(COVID-19 Case Rates), Pre-Treatment Stay-at-Home Behavior, COVID-19 Testing Rate, COVID-19 Reopening Policy, and Mask Wearing Policy*

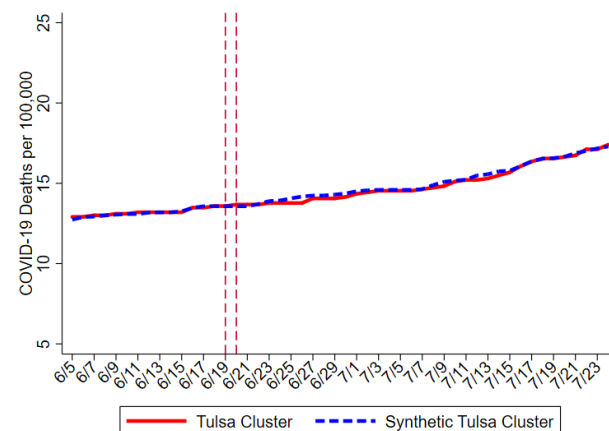

Note: The donor pool is comprised of primary counties (and their border counties) with urbanicity of  $\pm 2.5$  Tulsa County's urbanicity rate (95.2%) or weighted population density of  $\pm 1,000$  Tulsa County's density (3,250) and excludes counties in Oklahoma and in Oklahoma's border states, as well as counties where a home resident was detected (via smartphone using SafeGraph data) in the treatment CBGs on June 20, 2020.

## Appendix Figure 7, Continued

Panel (e): State of Oklahoma– Matching on Six days of Pre-Treatment COVID-19 Case Rates, Pre-Treatment Stay-at-Home Behavior, Mask Wearing Policy, and COVID-19 Reopening Policy

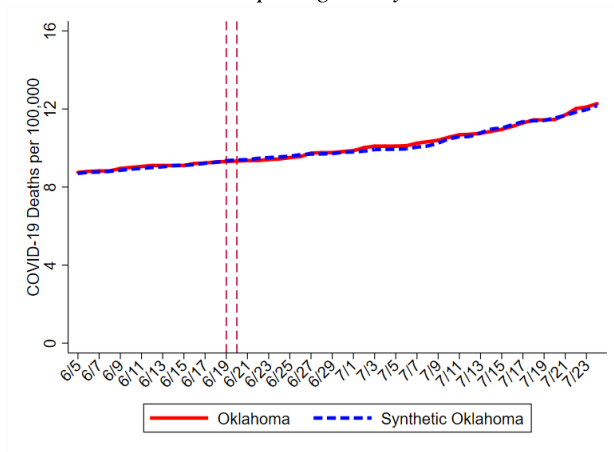

Panel (f): State of Oklahoma– Matching on Six days of Pre-Treatment COVID-19 Case Rates, Pre-Treatment Stay-at-Home Behavior, COVID-19 Testing Rate, COVID-19 Reopening Policy, and Mask Wearing Policy

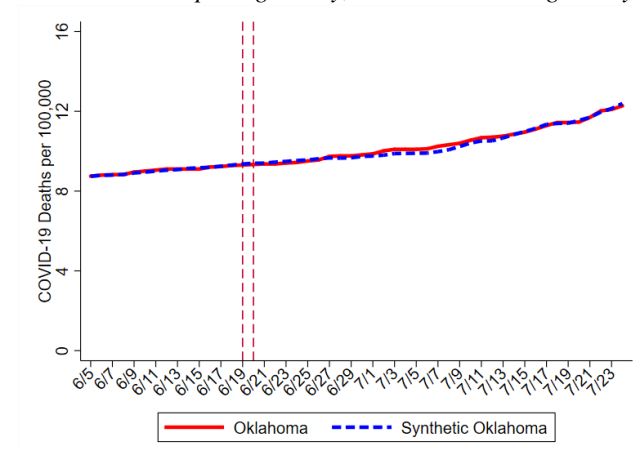

Note: The donor pool is comprised of states with urbanicity of  $\pm 15$  Oklahoma's urbanicity rate (65%) or with weighted population density  $\pm 750$  Oklahoma's Population Density (2,150) and excludes counties in Oklahoma and in Oklahoma's border states.

**Appendix Figure 8. Event-Study Analyses of Effect of Tulsa Rally on COVID-19 Deaths Per 100,000 Population in Oklahoma and Border States, by Dose (Absolute Inflow)**

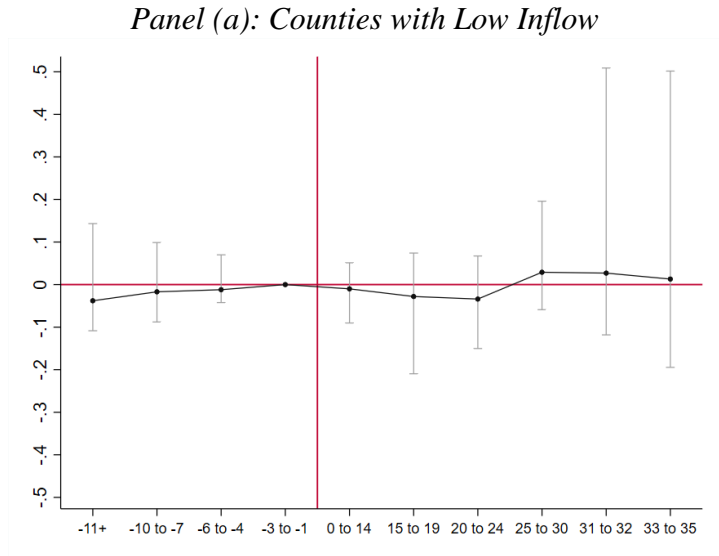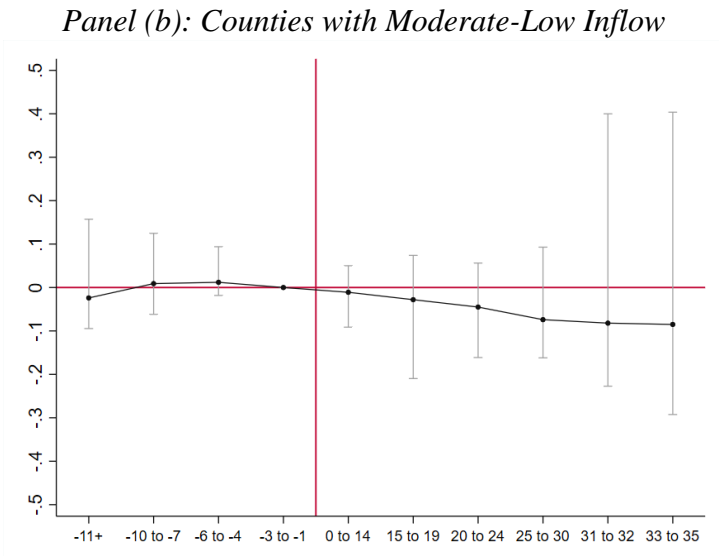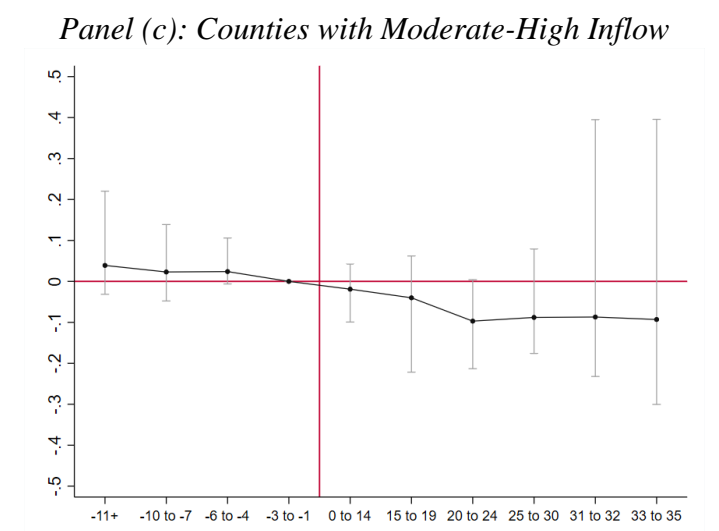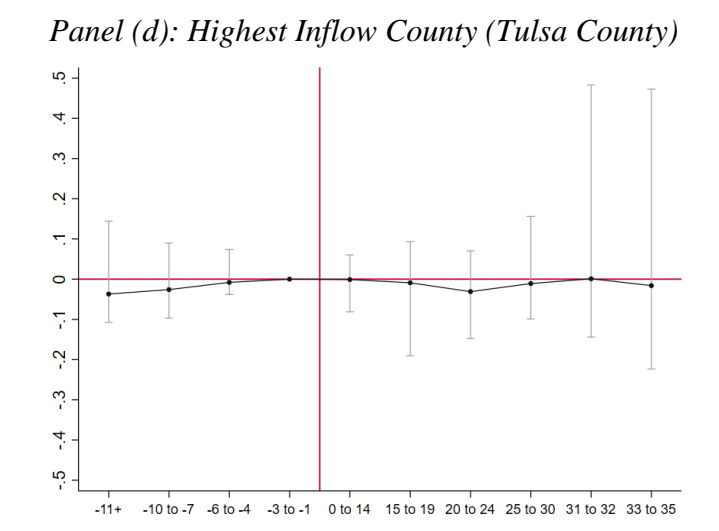

Note: Estimate is generated using weighted least squares estimate. All estimates include county and day fixed effects as well as county specific linear time trend. State policy controls include COVID-19 testing, an indicator for whether a state reopened restaurant or bars, an indicator for whether a state reopened retail services beyond curbside pickup, an indicator for whether a state reopened personal or pet care services, an indicator for whether a state reopened entertainment business, an indicator for whether a state reopened gyms or parks, and an indicator for whether a state paused reopening. County weather controls include average temperature and an indicator for whether any measurable precipitation fell.

**Appendix Table 1. Donor Pool that Received Positive Weights in Table 2**

|                                                  | COVID-19 Cases        |                           |                      | COVID-19 Deaths       |                            |     |
|--------------------------------------------------|-----------------------|---------------------------|----------------------|-----------------------|----------------------------|-----|
|                                                  | (1)                   | (2)                       | (3)                  | (4)                   | (5)                        | (6) |
| <i>Panel I: Tulsa County</i>                     |                       |                           |                      |                       |                            |     |
| La Crosse, WI (.430)                             | La Crosse, WI (.356)  | La Crosse, WI (.394)      | La Crosse, WI (.428) | La Crosse, WI (.421)  | Madera, CA (.413)          |     |
| Clark, OH (.150)                                 | Jefferson, AL (.231)  | Weber, UT (.157)          | Linn, IA (.172)      | Jefferson, AL (.214)  | Osceola, FL (.183)         |     |
| Lafayette, LA (.143)                             | Clark, OH (.140)      | Tulare, CA (.12)          | Jefferson, AL (.166) | Linn, IA (.150)       | Lafayette, LA (.076)       |     |
| Jefferson, AL (.122)                             | Dorchester, SC (.133) | Alachua, FL (.107)        | Story, IA (.125)     | Tippecanoe, IN (.148) | Olmsted, MN (.075)         |     |
| Dorchester, SC (.116)                            | Lafayette, LA (.074)  | Lafayette, LA (.102)      | Wayne, NE (.045)     | Blair, PA (.052)      | Schuykill, PA (.055)       |     |
| Pottawattamie, IA (.029)                         | Story, IA (.064)      | Charleston, SC (.056)     | Outagamie, WI (.043) |                       | Manatee, FL (.035)         |     |
|                                                  |                       | Story, IA (.031)          |                      |                       | St. John, LA (.016)        |     |
|                                                  |                       | Pottawattamie, IA (.019)  |                      |                       |                            |     |
| <i>Panel II: Tulsa County Cluster</i>            |                       |                           |                      |                       |                            |     |
| La Crosse, WI (.361)                             | Jefferson, AL (.275)  | Northumberland, PA (.325) | Wayne, NE (.412)     | Cabell, WV (.288)     | Madera, CA (.500)          |     |
| Vanderburgh, IN (.208)                           | La Crosse, WI (.207)  | La Crosse, WI (.308)      | Linn, IA (.234)      | Linn, IA (.274)       | Canyon, ID (.225)          |     |
| Clark, OH (.181)                                 | Ada, ID (.13)         | Charleston, SC (.132)     | Clarke, GA (.166)    | Clarke, GA (.161)     | Colonial Height, VA (.086) |     |
| Jefferson, AL (.136)                             | Clark, OH (.115)      | Lafayette, LA (.065)      | Muscogee, GA (.103)  | Muscogee, GA (.133)   | Eau Claire, WI (.062)      |     |
| Lafayette, LA (.093)                             | Linn, IA (.103)       | Muscogee, GA (.051)       | Poquoson, VA (.040)  | Clark, OH (.099)      | Manatee, FL (.036)         |     |
|                                                  | Lafayette, LA (.097)  | Santa Barbara, CA (.050)  | Jefferson, AL (.036) | Jefferson, AL (.023)  | Kenton, KY (.034)          |     |
|                                                  | Cabell, WV (.073)     | Tulare, CA (.033)         |                      | Wayne, NE (.023)      | Orange, NY (.019)          |     |
|                                                  |                       | Weber, UT (.032)          |                      |                       |                            |     |
| <i>Panel III: State of Oklahoma</i>              |                       |                           |                      |                       |                            |     |
|                                                  |                       |                           | MT (.511)            | MT (.442)             | WY (.362)                  |     |
| ID (.610)                                        | ID (.606)             | ID (.602)                 | ID (.257)            | ID (.364)             | AK (.279)                  |     |
| SC (.222)                                        | SC (.224)             | SC (.222)                 | MI (.098)            | MI (.094)             | MT (.159)                  |     |
| MT (.168)                                        | MT (.17)              | MT (.175)                 | WY (.085)            | WY (.057)             | ND (.098)                  |     |
|                                                  |                       |                           | AL (.049)            | AL (.043)             | MI (.062)                  |     |
|                                                  |                       |                           |                      |                       | IA (.041)                  |     |
| <i>Observables used to construct the weights</i> |                       |                           |                      |                       |                            |     |
| Number of pre-treatment days                     | 6                     | 6                         | 14                   | 6                     | 6                          | 14  |
| Matching on pre-treat Median Hours at Home       | Yes                   | Yes                       | No                   | Yes                   | Yes                        | No  |
| Matching on Reopening Policy?                    | Yes                   | Yes                       | No                   | Yes                   | Yes                        | No  |
| Matching on Mask Wearing Policy?                 | Yes                   | Yes                       | No                   | Yes                   | Yes                        | No  |
| Matching COVID-testing?                          | No                    | Yes                       | No                   | No                    | Yes                        | No  |

**Appendix Table 2. Synthetic Control Estimates of Effect of Tulsa Rally on COVID-19 Deaths Using 5 Weeks of Post-Treatment Data**

|                                                 | (1)     | (2)     | (3)     |
|-------------------------------------------------|---------|---------|---------|
| <i>Panel I: Tulsa County</i>                    |         |         |         |
| Trump Rally                                     | -0.024  | 0.079   | -1.344  |
| P-Value                                         | [0.896] | [0.877] | [0.537] |
| Pre-Treatment Mean of DV <sup>a</sup>           | 9.542   | 9.542   | 9.542   |
| <i>Panel II: Tulsa County Cluster</i>           |         |         |         |
| Trump Rally                                     | 0.016   | -0.100  | -1.089  |
| P-Value                                         | [0.937] | [0.937] | [0.330] |
| Pre-Treatment Mean of DV <sup>a</sup>           | 13.210  | 13.210  | 13.210  |
| <i>Panel III: State of Oklahoma</i>             |         |         |         |
| Trump Rally                                     | 0.041   | 0.059   | 0.171   |
| P-Value                                         | [0.913] | [0.913] | [0.565] |
| Pre-Treatment Mean of DV <sup>a</sup>           | 9.044   | 9.044   | 9.044   |
| <i>Observable used to construct the weights</i> |         |         |         |
| Number of pre-treatment days                    | 6       | 6       | 14      |
| Matching on Median Hours at Home                | Yes     | Yes     | No      |
| Matching on Reopening Policy?                   | Yes     | Yes     | No      |
| Matching on Mask Wearing Policy?                | Yes     | Yes     | No      |
| Matching COVID-testing?                         | No      | Yes     | No      |

\* Significant at the 10% level, \*\* Significant at the 5% level, \*\*\* Significant at the 1% level

Notes: Estimate is generated using synthetic control methods. Matching was conducted using the pre-treatment COVID-19 case rate and variables listed under each column. The permutation-based p-values are included in brackets below each point estimate (Abadie et al. 2010).

<sup>a</sup> Pre-treatment mean of the Dependent Variable (DV) is calculated using the treated unit.

**Appendix Table 3. Dose-Response DD Estimates of Effect of Tulsa Rally on Inverse Hyperbolic Sine of COVID-19 Deaths Using 5 Weeks of Post-Treatment Data**

|                                             | <i>Absolute Inflow</i> |         | <i>Relative Inflow</i> |         |
|---------------------------------------------|------------------------|---------|------------------------|---------|
|                                             | (1)                    | (2)     | (3)                    | (4)     |
| <i>Counties with Low Inflow</i>             |                        |         |                        |         |
| June 20-July 4 (0-14 Days After Rally)      | -0.017                 | -0.018  | -0.022                 | -0.024  |
| P-Value                                     | [0.740]                | [0.760] | [0.712]                | [0.837] |
| June 26-July 10 (6-20 Days After Rally)     | -0.059                 | -0.062  | -0.063                 | -0.067  |
| P-Value                                     | [0.817]                | [0.846] | [0.817]                | [0.865] |
| June 11-July 19 (21-29 Days After Rally)    | -0.032                 | -0.034  | -0.022                 | -0.025  |
| P-Value                                     | [0.202]                | [0.240] | [0.250]                | [0.212] |
| July 20 onward (30+ Days After Rally)       | -0.035                 | -0.036  | -0.027                 | -0.032  |
| P-Value                                     | [0.240]                | [0.317] | [0.337]                | [0.231] |
| <i>Counties with Moderate- Low Inflow</i>   |                        |         |                        |         |
| June 20-July 4 (0-14 Days After Rally)      | -0.011                 | -0.015  | -0.001                 | -0.001  |
| P-Value                                     | [0.712]                | [0.740] | [0.654]                | [0.731] |
| June 26-July 10 (6-20 Days After Rally)     | -0.035                 | -0.043  | -0.036                 | -0.039  |
| P-Value                                     | [0.788]                | [0.760] | [0.779]                | [0.846] |
| June 11-July 19 (21-29 Days After Rally)    | -0.075                 | -0.078  | -0.045                 | -0.043  |
| P-Value                                     | [0.808]                | [0.673] | [0.760]                | [0.346] |
| July 20 onward (30+ Days After Rally)       | -0.101                 | -0.101  | -0.068                 | -0.064  |
| P-Value                                     | [0.279]                | [0.596] | [0.375]                | [0.317] |
| <i>Counties with Moderate- High Inflow</i>  |                        |         |                        |         |
| June 20-July 4 (0-14 Days After Rally)      | -0.024                 | -0.018  | -0.003                 | 0.001   |
| P-Value                                     | [0.779]                | [0.779] | [0.663]                | [0.740] |
| June 26-July 10 (6-20 Days After Rally)     | -0.029                 | -0.039  | -0.056                 | -0.054  |
| P-Value                                     | [0.769]                | [0.721] | [0.192]                | [0.317] |
| June 11-July 19 (21-29 Days After Rally)    | -0.047                 | -0.059  | -0.053                 | -0.042  |
| P-Value                                     | [0.212]                | [0.346] | [0.769]                | [0.404] |
| July 20 onward (30+ Days After Rally)       | -0.057                 | -0.048  | 0.005                  | 0.028   |
| P-Value                                     | [0.260]                | [0.346] | [0.346]                | [0.308] |
| <i>Highest Inflow County (Tulsa County)</i> |                        |         |                        |         |
| June 20-July 4 (0-14 Days After Rally)      | -0.006                 | 0.001   | 0.001                  | -0.002  |
| P-Value                                     | [0.702]                | [0.692] | [0.644]                | [0.721] |
| June 26-July 10 (6-20 Days After Rally)     | -0.029                 | -0.030  | 0.011                  | 0.007   |
| P-Value                                     | [0.779]                | [0.731] | [0.202]                | [0.308] |
| June 11-July 19 (21-29 Days After Rally)    | -0.047                 | -0.038  | -0.047                 | -0.046  |
| P-Value                                     | [0.221]                | [0.337] | [0.779]                | [0.394] |
| July 20 onward (30+ Days After Rally)       | -0.057                 | -0.038  | -0.064                 | -0.059  |
| P-Value                                     | [0.269]                | [0.356] | [0.356]                | [0.298] |
| N                                           | 36873                  | 36873   | 36873                  | 36873   |
| Observable Controls?                        | No                     | Yes     | No                     | Yes     |

\* Significant at the 10% level, \*\* Significant at the 5% level, \*\*\* Significant at the 1% level

Note: Estimate is generated using weighted least squares estimate. All estimates include county and day fixed effects as well as county specific linear time trend. State policy controls include log COVID-19 testing, an indicator for whether a state reopened restaurant or bars, an indicator for whether a state reopened retail services beyond curbside pickup, an indicator for whether a state reopened personal or pet care services, an indicator for

whether a state reopened entertainment business, an indicator for whether a state reopened gyms, and an indicator for whether a state paused reopening. County weather controls include average temperature and an indicator for whether any measurable precipitation fell. BLM Protest control include an indicator for whether a county had a city with 100,000 or more population with a Black Lives Matter protest. Permutation based p-value are included inside the bracket below each point estimate (Buchmueller et al. 2011; Cunningham and Shah (2018)).



**Appendix Table 4. Robustness of Synthetic Control Estimates of Effect of Tulsa Rally on Cumulative COVID-19 Deaths Per 100,000 Population to Using 8 Weeks of Post-Treatment Data**

|                                                 | (1)     | (2)     |
|-------------------------------------------------|---------|---------|
| <i>Panel I: Tulsa County</i>                    |         |         |
| Trump Rally                                     | 0.220   | 0.403   |
| P-Value                                         | [0.733] | [0.646] |
| Pre-Treatment Mean of DV <sup>a</sup>           | 9.542   | 9.542   |
| <i>Panel II: Tulsa County Cluster</i>           |         |         |
| Trump Rally                                     | 0.880   | 0.830   |
| P-Value                                         | [0.597] | [0.578] |
| Pre-Treatment Mean of DV <sup>a</sup>           | 13.210  | 13.210  |
| <i>Panel III: State of Oklahoma</i>             |         |         |
| Trump Rally                                     | 0.504   | 0.207   |
| P-Value                                         | [0.667] | [0.875] |
| Pre-Treatment Mean of DV <sup>a</sup>           | 9.044   | 9.044   |
| <i>Observable used to construct the weights</i> |         |         |
| Number of pre-treatment days                    | 6       | 6       |
| Matching on Median Hours at Home                | Yes     | Yes     |
| Matching on Reopening Policy?                   | Yes     | Yes     |
| Matching on Mask Wearing Policy?                | Yes     | Yes     |
| Matching COVID-testing?                         | No      | Yes     |

Notes: Estimate is generated using synthetic control methods. Matching was conducted using the pre-treatment COVID-19 death rate and variables listed under each column. The permutation-based p-values are included in brackets below each point estimate (Abadie et al. 2010).

**Appendix Table 5. Dose-Response Difference-in-Differences Estimates of the Effect of Tulsa Rally on Inverse Hyperbolic Sine Transformed (COVID-19 Deaths) Using 8 Weeks of Post-Treatment Data**

|                                              | <i>Absolute Inflow</i> |         | <i>Relative Inflow</i> |         |
|----------------------------------------------|------------------------|---------|------------------------|---------|
|                                              | (1)                    | (2)     | (3)                    | (4)     |
| <i>Counties with Low Inflow</i>              |                        |         |                        |         |
| June 20-July 4 (0-14 Days After Rally)       | 0.019                  | 0.027   | -0.001                 | 0.002   |
| P-Value                                      | [0.692]                | [0.558] | [0.644]                | [0.558] |
| July 5-July 11 (15-21 Days After Rally)      | 0.004                  | 0.000   | -0.026                 | -0.019  |
| P-Value                                      | [0.760]                | [0.529] | [0.731]                | [0.558] |
| July 12-July 18 (22-28 Days After Rally)     | 0.045                  | 0.043   | 0.022                  | 0.026   |
| P-Value                                      | [0.692]                | [0.510] | [0.692]                | [0.577] |
| July 19- July 25 (29-35 Days After Rally)    | 0.058                  | 0.055   | 0.034                  | 0.030   |
| P-Value                                      | [0.731]                | [0.577] | [0.702]                | [0.635] |
| July 26- August 8 (36-49 Days After Rally)   | -0.093                 | -0.096  | -0.068                 | -0.072  |
| P-Value                                      | [0.327]                | [0.327] | [0.385]                | [0.346] |
| August 9- August 15 (50-56 Days After Rally) | -0.157                 | -0.160  | -0.124                 | -0.128  |
| P-Value                                      | [0.365]                | [0.337] | [0.404]                | [0.356] |
| <i>Counties with Moderate- Low Inflow</i>    |                        |         |                        |         |
| June 20-July 4 (0-14 Days After Rally)       | 0.029                  | 0.046   | 0.066                  | 0.090   |
| P-Value                                      | [0.673]                | [0.529] | [0.163]                | [0.462] |
| July 5-July 11 (15-21 Days After Rally)      | 0.034                  | 0.030   | 0.081                  | 0.066   |
| P-Value                                      | [0.721]                | [0.462] | [0.606]                | [0.442] |
| July 12-July 18 (22-28 Days After Rally)     | 0.019                  | 0.017   | 0.106                  | 0.098   |
| P-Value                                      | [0.740]                | [0.625] | [0.212]                | [0.346] |
| July 19- July 25 (29-35 Days After Rally)    | 0.001                  | 0.003   | 0.110                  | 0.114   |
| P-Value                                      | [0.788]                | [0.673] | [0.260]                | [0.481] |
| July 26- August 8 (36-49 Days After Rally)   | -0.225                 | -0.221  | -0.148                 | -0.143  |
| P-Value                                      | [0.808]                | [0.654] | [0.837]                | [0.462] |
| August 9- August 15 (50-56 Days After Rally) | -0.297                 | -0.297  | -0.222                 | -0.219  |
| P-Value                                      | [0.442]                | [0.644] | [0.865]                | [0.558] |
| <i>Counties with Moderate- High Inflow</i>   |                        |         |                        |         |
| June 20-July 4 (0-14 Days After Rally)       | 0.008                  | 0.054   | 0.113*                 | 0.148   |
| P-Value                                      | [0.702]                | [0.500] | [0.096]                | [0.182] |
| July 5-July 11 (15-21 Days After Rally)      | 0.019                  | -0.032  | 0.145                  | 0.107   |
| P-Value                                      | [0.740]                | [0.625] | [0.154]                | [0.298] |
| July 12-July 18 (22-28 Days After Rally)     | 0.000                  | -0.030  | 0.172                  | 0.150   |
| P-Value                                      | [0.760]                | [0.692] | [0.173]                | [0.346] |
| July 19- July 25 (29-35 Days After Rally)    | 0.026                  | 0.007   | 0.318                  | 0.307   |
| P-Value                                      | [0.769]                | [0.663] | [0.192]                | [0.144] |
| July 26- August 8 (36-49 Days After Rally)   | -0.212                 | -0.234  | 0.019                  | 0.017   |
| P-Value                                      | [0.375]                | [0.712] | [0.327]                | [0.298] |
| August 9- August 15 (50-56 Days After Rally) | -0.234                 | -0.256  | -0.063                 | -0.067  |
| P-Value                                      | [0.404]                | [0.558] | [0.346]                | [0.327] |

*Highest Inflow County (Tulsa County)*

|                                              |         |         |         |         |
|----------------------------------------------|---------|---------|---------|---------|
| June 20-July 4 (0-14 Days After Rally)       | 0.063   | 0.105   | 0.006   | 0.022   |
| P-Value                                      | [0.615] | [0.375] | [0.625] | [0.538] |
| July 5-July 11 (15-21 Days After Rally)      | 0.090   | 0.033   | 0.022   | 0.013   |
| P-Value                                      | [0.663] | [0.433] | [0.663] | [0.538] |
| July 12-July 18 (22-28 Days After Rally)     | 0.104   | 0.071   | -0.026  | -0.03   |
| P-Value                                      | [0.644] | [0.423] | [0.731] | [0.654] |
| July 19- July 25 (29-35 Days After Rally)    | 0.119   | 0.096   | -0.047  | -0.043  |
| P-Value                                      | [0.692] | [0.538] | [0.750] | [0.663] |
| July 26- August 8 (36-49 Days After Rally)   | -0.192  | -0.221  | -0.144  | -0.143  |
| P-Value                                      | [0.365] | [0.644] | [0.827] | [0.471] |
| August 9- August 15 (50-56 Days After Rally) | -0.279  | -0.308  | -0.155  | -0.157  |
| P-Value                                      | [0.433] | [0.683] | [0.442] | [0.385] |
| N                                            | 52056   | 52056   | 52056   | 52056   |
| Observable Controls?                         | No      | Yes     | No      | Yes     |

\* Significant at the 10% level, \*\* Significant at the 5% level, \*\*\* Significant at the 1% level

Note: Estimate is generated using weighted least squares estimate. All estimates include county and day fixed effects as well as county specific linear time trend. State policy controls include log COVID-19 testing, an indicator for whether a state reopened restaurant or bars, an indicator for whether a state reopened retail services beyond curbside pickup, an indicator for whether a state reopened personal or pet care services, an indicator for whether a state reopened entertainment business, an indicator for whether a state reopened gyms, and an indicator for whether a state paused reopening. County weather controls include average temperature and an indicator for whether any measurable precipitation fell. BLM Protest control include an indicator for whether a county had a city with 100,000 or more population with a Black Lives Matter protest. Permutation based p-value are included inside the bracket below each point estimate (Buchmueller et al. 2011; Cunningham and Shah 2018).

**Appendix Table 6. Synthetic Control Estimates of Effect of Tulsa Rally on Three-day Moving Average of COVID-19 Case Growth Rate**

|                                       | Tulsa County | Tulsa County Cluster | Oklahoma |
|---------------------------------------|--------------|----------------------|----------|
|                                       | (1)          | (2)                  | (3)      |
| Trump Rally                           | -0.002       | 0.001                | -0.010   |
| P-Value                               | [0.663]      | [0.810]              | [0.522]  |
| Pre-Treatment Mean of DV <sup>a</sup> | 0.028        | 0.029                | 0.018    |

\* Significant at the 10% level, \*\* Significant at the 5% level, \*\*\* Significant at the 1% level

Notes: Estimate is generated using synthetic control methods. The donor pool is comprised of counties with urbanicity rates of  $\pm 2.5\%$  of Tulsa County urbanicity rate (95.2%) or weighted population density of  $\pm 1,000$  people per sq. mi. of Tulsa County weighted population density (3,250) and exclude counties in Oklahoma and in Oklahoma's border states, as well as counties where a home resident was detected (via smartphone using SafeGraph data) in the treatment CBGs on June 20, 2020. All synthetic control estimates match on all days of pre-treatment COVID-19 growth rate.

<sup>a</sup> Pre-treatment mean of the Dependent Variable (DV) is calculated using the treated unit.

**Appendix Table 7. Synthetic Control Estimates of Effect of Tulsa Rally on COVID-19 Case and Death Rate Using Different Donor Pools**

|                                       | Cases per 100,000 |          | Deaths per 100,000 |         |
|---------------------------------------|-------------------|----------|--------------------|---------|
|                                       | (1)               | (2)      | (3)                | (4)     |
| <i>Panel I: Tulsa County</i>          |                   |          |                    |         |
| Trump Rally                           | -57.201           | -104.822 | 0.330              | -0.541  |
| P-Value                               | [0.411]           | [0.240]  | [0.667]            | [0.760] |
| Pre-Treatment Mean of DV <sup>a</sup> | 230.099           | 230.099  | 9.542              | 9.542   |
| <i>Panel II: Tulsa Cluster</i>        |                   |          |                    |         |
| Trump Rally                           | 29.159            | -115.975 | 0.143              | -1.114  |
| P-Value                               | [0.494]           | [0.100]  | [0.944]            | [0.400] |
| Pre-Treatment Mean of DV <sup>a</sup> | 227.892           | 227.892  | 13.210             | 13.210  |
| <i>Panel III: State of Oklahoma</i>   |                   |          |                    |         |
| Trump Rally                           | -73.154           | -111.668 | 0.318              | 0.187   |
| P-Value                               | [0.364]           | [0.174]  | [0.409]            | [0.434] |
| Pre-Treatment Mean of DV <sup>a</sup> | 203.002           | 203.002  | 9.044              | 9.044   |
| Population Density Cut for Donors     | Yes               | No       | Yes                | No      |
| Urbanicity Cut for Donors             | No                | Yes      | No                 | Yes     |

\* Significant at the 10% level, \*\* Significant at the 5% level, \*\*\* Significant at the 1% level

Note: Estimate is generated using synthetic control method. Matching was based on six days of pre-treatment COVID-19 case rates, pre-treatment stay-at-home behavior, COVID-19 testing rate, COVID-19 reopening policy, and mask wearing policy. Donor pool is restricted to counties/states with similar weight population or urbanicity as Tulsa/Oklahoma.
